# Supplementary material for: Photoinduced electron and hole transfers in carbazole dendrimers with heteroleptic Ir-complex cores
Source: Royal Society of Chemistry journal article supplement (doi:10.1039/c8cp04971h), 2018-01-01
Supplement: c8cp04971h1.pdf [file c8cp04971h1.pdf]

## Photoinduced electron and hole transfers in carbazole dendrimers with heteroleptic Ir-complex cores

Received 00th January 20xx,  
Accepted 00th January 20xx

So-Yoen Kim,<sup>a</sup> Yang-Jin Cho,<sup>a</sup> Bo-Sun Yun,<sup>a</sup> Ho-Jin Son,<sup>\*a</sup> Dae Won Cho<sup>\*ab</sup> and Sang Ook Kang<sup>\*a</sup>

DOI: 10.1039/x0xx00000x

<sup>a</sup>Department of Advanced Materials Chemistry, Korea University, Sejong, 30019, South Korea. E-mails: [hjson@korea.ac.kr](mailto:hjson@korea.ac.kr), [sangok@korea.ac.kr](mailto:sangok@korea.ac.kr)

[www.rsc.org/](http://www.rsc.org/)

<sup>b</sup>Center for Photovoltaic Materials, Korea University, Sejong, 30019, South Korea. E-mail: [dwcho@korea.ac.kr](mailto:dwcho@korea.ac.kr)

### Figures

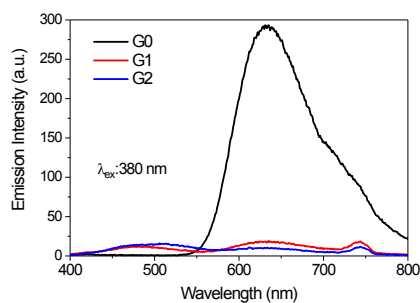

**Fig. S1.** Emission spectra of **G0**, **G1** and **G2** in  $\text{CH}_2\text{Cl}_2$ . Excitation wavelength is 380 nm.

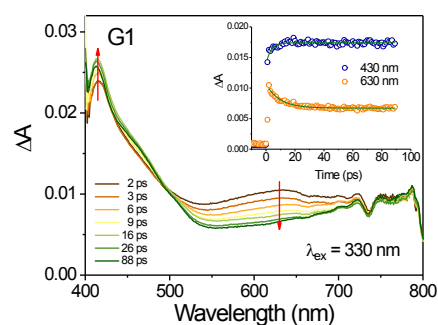

**Fig. S3.** Transient absorption spectra of **G1** in  $\text{CH}_2\text{Cl}_2$  at various time delays. Excitation wavelength is 330 nm. Inset figure indicates the decay profiles monitored at 430 and 630 nm, respectively.

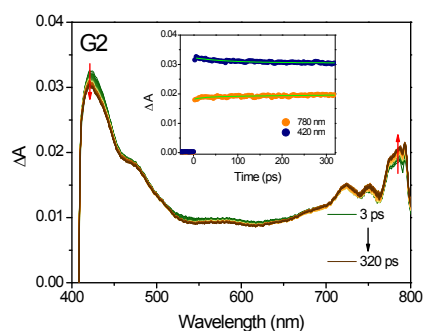

**Fig. S2.** Transient absorption spectra of **G2** in  $\text{CH}_2\text{Cl}_2$  at various time delays. Excitation wavelength is 400 nm. Inset figure indicates the decay profiles monitored at 420 and 780 nm, respectively.

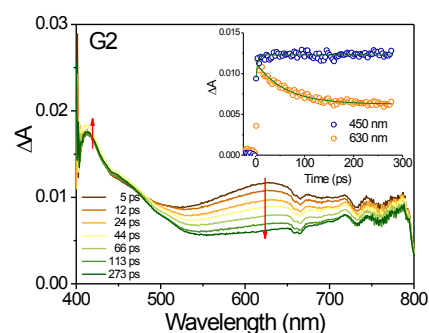

**Fig. S4.** Transient absorption spectra of **G2** in  $\text{CH}_2\text{Cl}_2$  at various time delays. Excitation wavelength is 330 nm. Inset figure indicates the decay profiles monitored at 450 and 630 nm, respectively.

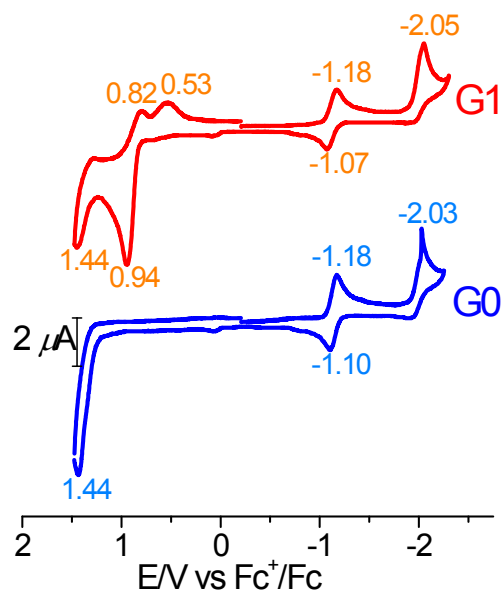

**Fig. S5.** Cyclic voltammograms for 0.5 mM  $\text{CH}_2\text{Cl}_2$  solution of **G0** and **G1** containing 0.1 M TBAPF taken at a scan rate of 0.1 V/s.

### CV measurement

The cyclic voltammetry experiments were performed using an electrochemical analyzer (Bioanalytical System Inc., BAS 100). The three-electrode cell system used comprised a glassy carbon electrode as the working electrode, and a platinum wire and  $\text{Ag}/\text{AgNO}_3$  as a counter and reference electrodes, respectively. The potential values were measured relative to an internal ferrocenium/ferrocene reference ( $\text{Fc}^+/\text{Fc}$ ). Freshly distilled,  $\text{N}_2$ -purged  $\text{CH}_2\text{Cl}_2$  was used as the solvent with 0.1 M tetrabutylammonium tetrafluoroborate electrolyte as the supporting electrolyte.

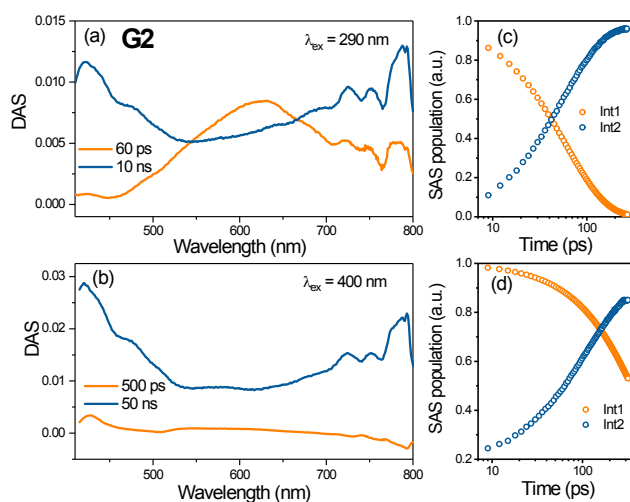

**Fig. S6.** (a) and (b) are simulated DAS of **G2** with the associated exponential time constants resulting from a global fit of the TA data. (b) and (d) show SAS population change for intermediates of **G1** (INT) of **G1** (INT 1, navy blue; INT 2, orange). (a), (c) and (b), (d) obtained upon excitation with 290 nm and 400 nm, respectively.
